# Supplementary material
Source: ML conference proceedings conference paper supplement (https://proceedings.neurips.cc/paper_files/paper/2012/hash/ba2fd310dcaa8781a9a652a31baf3c68-Abstract.html)
Supplement: Supplementary file 1 [file ba2fd310dcaa8781a9a652a31baf3c68-Supplemental.zip]

000  
001  
002  
003  
004  
005  
006  
007  
008  
009  
010  
011  
012  
013  
014  
015  
016  
017  
018  
019  
020  
021  
022  
023  
024  
025  
026  
027  
028  
029  
030  
031  
032  
033  
034  
035  
036  
037  
038  
039  
040  
041  
042  
043  
044  
045  
046  
047  
048  
049  
050  
051  
052  
053

---

# Clustering by Nonnegative Matrix Factorization Using Graph Random Walk (Supplemental Document)

---

Anonymous Author(s)

Affiliation

Address

email

## 1 Datasets

Brief description of the datasets

- STRIKE: the Pajek *Strike* dataset, a small social network during a strike.
- KOREA: the Pejek *Korea* dataset, a communication network within a small enterprise.
- AMLALL: the AML/ALL leukemia gene expression data, with 5000 genes.
- DUKE: the LIBSVM *duke breast-cancer* dataset, for predicting the clinical status of human breast cancer by using gene expression profiles, originally with 7129 features.
- HIGHSCHOOL: the Pejek *Highschool* dataset, a friend network in a high school; we used a subset of the five largest classes.
- KHAN: the *khan* dataset from the textbook “The Elements of Statistical Learning”, gene expression data, 2318 genes.
- POLBOOKS: the *Books about US politics* dataset from Newman’s collection, a network of books about US politics published around the time of the 2004 presidential election and sold by the online bookseller Amazon.com.
- FOOTBALL: the Pejek *Football* dataset, network data, games between 22 soccer teams which participated in the World Championship in Paris, 1998.
- IRIS: the UCI *Iris* dataset.
- CANCER: the *14cancer* dataset from the textbook “The Elements of Statistical Learning”, gene expression data of 16063 genes.
- SPECT: the UCI *Low Resolution Spectrometer* dataset, spectra derived from the IRAS-LRS (Infra-Red Astronomy Satellite-Low Resolution Observation) database, originally with 102 attributes.
- ROSETTA: microarray data set from Rosetta Inpharmatics, Inc, originally with 12634 dimensions.
- ECOLI: the UCI *Ecoli* dataset, containing protein localization sites, originally with 8 attributes.
- IONOSPHERE: the UCI *ionosphere* dataset, for classification of radar returns from the ionosphere, originally with 34 attributes.
- ORL: the AT&T ORL database of face images, each image of size  $92 \times 112$
- UMIST: the *Sheffield (previously UMIST) Face Database*, each face image of size  $92 \times 112$ .
- WDBC: the the LIBSVM *breast-cancer* dataset, originally named *Wisconsin Breast Cancer* in UCI, with 10 features.

054  
055  
056  
057  
058  
059  
060  
061  
062  
063  
064  
065  
066  
067  
068  
069  
070  
071  
072  
073  
074  
075  
076  
077  
078  
079  
080  
081  
082  
083  
084  
085  
086  
087  
088  
089  
090  
091  
092  
093  
094  
095  
096  
097  
098  
099  
100  
101  
102  
103  
104  
105  
106  
107

Table 1: Dataset statistics

| Dataset    | #samples | #classes | Domain    | Source |
|------------|----------|----------|-----------|--------|
| STRIKE     | 24       | 3        | social    | PAJEK  |
| KOREA      | 35       | 2        | social    | PAJEK  |
| AMLALL     | 38       | 3        | gene      | AMLALL |
| DUKE       | 44       | 2        | medical   | LIBSVM |
| HIGHSCHOOL | 60       | 5        | social    | PAJEK  |
| KHAN       | 83       | 4        | gene      | ELML   |
| POLBOOKS   | 105      | 3        | social    | NEWMAN |
| FOOTBALL   | 115      | 12       | social    | PAJEK  |
| IRIS       | 150      | 3        | biology   | UCI    |
| CANCER     | 198      | 14       | medical   | ELML   |
| SPECT      | 267      | 3        | astronomy | UCI    |
| ROSETTA    | 300      | 5        | gene      | ROSETT |
| ECOLI      | 327      | 5        | protein   | UCI    |
| IONOSPHERE | 351      | 2        | radar     | UCI    |
| ORL        | 400      | 40       | image     | ORL    |
| UMIST      | 575      | 20       | image     | UMIST  |
| WDBC       | 683      | 2        | medical   | LIBSVM |
| DIABETES   | 768      | 2        | medical   | LIBSVM |
| VOWEL      | 990      | 11       | audio     | LIBSVM |
| MED        | 1033     | 31       | text      | LSI    |
| PIE        | 1166     | 53       | image     | PIE    |
| YALEB      | 1292     | 38       | image     | YALEB  |
| TERROR     | 1293     | 6        | social    | LINQS  |
| ALPHADIGS  | 1404     | 36       | image     | ROWEIS |
| COIL-20    | 1440     | 20       | image     | COIL   |
| YEAST      | 1484     | 10       | biology   | UCI    |
| SEMEION    | 1593     | 10       | image     | UCI    |
| FAULTS     | 1941     | 7        | steel     | UCI    |
| SEG        | 2310     | 7        | image     | UCI    |
| ADS        | 2359     | 2        | network   | CHEN   |
| CORA       | 2708     | 7        | text      | LINQS  |
| MIREX      | 3090     | 10       | music     | CHEN   |
| CITeseer   | 3312     | 6        | texts     | LINQS  |
| WEBKB4     | 4196     | 4        | texts     | CMUTE  |
| 7SECTORS   | 4556     | 7        | texts     | CMUTE  |
| SPAM       | 4601     | 2        | email     | ELML   |
| CURETGREY  | 5612     | 61       | image     | CURET  |
| OPTDIGITS  | 5620     | 10       | image     | UCI    |
| GISETTE    | 7000     | 2        | image     | LIBSVM |
| REUTERS    | 8293     | 65       | texts     | UCI    |
| RCV1       | 9625     | 4        | texts     | RCV1   |
| PENDIGITS  | 10992    | 10       | image     | UCI    |
| PROTEIN    | 17766    | 3        | protein   | LIBSVM |
| 20NEWS     | 19938    | 20       | texts     | CMUTE  |
| MNIST      | 70000    | 10       | image     | MNIST  |
| SEISMIC    | 98528    | 3        | sensor    | LIBSVM |

- DIABETES: the LIBSVM *diabetes* dataset, originally from UCI, with 8 features.
- VOWEL: the LIBSVM *vowel* dataset, originally from UCI, with 10 features.
- MED: the *MED* abstract text collection, with 5831 words.
- PIE: the *PIE* face image dataset, each of size  $32 \times 32$
- YALEB: the *Yale-B* face image dataset, each of size  $168 \times 192$ .
- TERROR: the *Terrorist Attacks* from LINQS, relationships of terrorism attack entities.

108  
109  
110  
111  
112  
113  
114  
115  
116  
117  
118  
119  
120  
121  
122  
123  
124  
125  
126  
127  
128  
129  
130  
131  
132  
133  
134  
135  
136  
137  
138  
139  
140  
141  
142  
143  
144  
145  
146  
147  
148  
149  
150  
151  
152  
153  
154  
155  
156  
157  
158  
159  
160  
161

Table 2: Data sources

|        |                                                                                                                                                   |
|--------|---------------------------------------------------------------------------------------------------------------------------------------------------|
| PAJEK  | <a href="http://vlado.fmf.uni-lj.si/pub/networks/data/">http://vlado.fmf.uni-lj.si/pub/networks/data/</a>                                         |
| NEWMAN | <a href="http://www-personal.umich.edu/~mejn/netdata/">http://www-personal.umich.edu/~mejn/netdata/</a>                                           |
| LIBSVM | <a href="http://www.csie.ntu.edu.tw/~cjlin/libsvmtools/datasets/">http://www.csie.ntu.edu.tw/~cjlin/libsvmtools/datasets/</a>                     |
| ELML   | <a href="http://www-stat-class.stanford.edu/~tibs/ElemStatLearn/data.html">http://www-stat-class.stanford.edu/~tibs/ElemStatLearn/data.html</a>   |
| UCI    | <a href="http://archive.ics.uci.edu/ml/">http://archive.ics.uci.edu/ml/</a>                                                                       |
| LINQS  | <a href="http://www.cs.umd.edu/projects/linqs/projects/lbc/index.html">http://www.cs.umd.edu/projects/linqs/projects/lbc/index.html</a>           |
| ROWEIS | <a href="http://www.cs.nyu.edu/~roweis/data.html">http://www.cs.nyu.edu/~roweis/data.html</a>                                                     |
| CHEN   | <a href="http://idl.ee.washington.edu/SimilarityLearning/">http://idl.ee.washington.edu/SimilarityLearning/</a>                                   |
| ORL    | <a href="http://www.cl.cam.ac.uk/research/dtg/attarchive/facedatabase.html">http://www.cl.cam.ac.uk/research/dtg/attarchive/facedatabase.html</a> |
| UMIST  | <a href="http://www.sheffield.ac.uk/eee/research/iel/research/face">http://www.sheffield.ac.uk/eee/research/iel/research/face</a>                 |
| PIE    | <a href="http://vasc.ri.cmu.edu/idb/html/face/">http://vasc.ri.cmu.edu/idb/html/face/</a>                                                         |
| YALEB  | <a href="http://vision.ucsd.edu/~leekc/ExtYaleDatabase/ExtYaleB.html">http://vision.ucsd.edu/~leekc/ExtYaleDatabase/ExtYaleB.html</a>             |
| COIL   | <a href="http://www.cs.columbia.edu/CAVE/software/softlib/coil-20.php">http://www.cs.columbia.edu/CAVE/software/softlib/coil-20.php</a>           |
| MNIST  | <a href="http://yann.lecun.com/exdb/mnist/">http://yann.lecun.com/exdb/mnist/</a>                                                                 |
| 20NEWS | <a href="http://people.csail.mit.edu/jrennie/20Newsgroups/">http://people.csail.mit.edu/jrennie/20Newsgroups/</a>                                 |
| WEBKB  | <a href="http://www.cs.cmu.edu/afs/cs.cmu.edu/project/theo-20/www/data/">http://www.cs.cmu.edu/afs/cs.cmu.edu/project/theo-20/www/data/</a>       |
| CMUTE  | <a href="http://www.cs.cmu.edu/~TextLearning/datasets.html">http://www.cs.cmu.edu/~TextLearning/datasets.html</a>                                 |
| RCV1   | <a href="http://www.ai.mit.edu/projects/jmlr/papers/volume5/lewis04a/">http://www.ai.mit.edu/projects/jmlr/papers/volume5/lewis04a/</a>           |
| CURET  | <a href="http://www.robots.ox.ac.uk/~vgg/research/texclass/index.html">http://www.robots.ox.ac.uk/~vgg/research/texclass/index.html</a>           |
| LSI    | <a href="http://web.eecs.utk.edu/research/lsi/">http://web.eecs.utk.edu/research/lsi/</a>                                                         |
| AMLALL | [1]                                                                                                                                               |
| ROSETT | [2]                                                                                                                                               |

- ALPHADIGS: the *Binary Alphadigits* dataset from Sam Roweis’ collection, each sample is a binary image of a letter or digit, of size  $20 \times 16$
- COIL-20: the *COIL-20* dataset from Columbia University Image Library, toy images of different angles, each image of size  $128 \times 128$ .
- YEAST: the UCI *Yeast* dataset, for predicting the cellular localization sites of proteins, originally with 8 features.
- SEMEION: the UCI *Semeion Handwritten Digit* dataset; each sample is an image of size  $16 \times 16$
- FAULTS: the UCI *Steel Plates Faults* dataset, steel plate faults, classified into 7 different types, originally with 27 dimensions.
- SEG: the UCI *Image Segmentation* dataset, image patches from 7 outdoor images, originally with 19 high-level features.
- ADS: the *Internet Ads* similarity dataset from Chen’s collection.
- CORA: the LINQS *Cora* dataset, text documents, with 1433 words
- MIREX: the *Mirex07* similarity dataset from Chen’s collection.
- CITeseer: the LINQS *CiteSeer* dataset, text documents, with 3703 words
- WEBKB4: the *WebKB4* dataset from CMU Text Learning group, text documents; 10,000 words with maximum information gain are preserved.
- 7SECTORS: the *4 Universities* dataset from CMU Text Learning group, text documents classified to 7 sectors; 10,000 words with maximum information gain are preserved.
- SPAM: the *spam* dataset from the textbook “The Elements of Statistical Learning”, originally with 57 dimensions.
- CURETGREY: texture image data, each image of size  $200 \times 200$ . We down-sampled images to  $100 \times 100$  before extracting the scattering features.
- OPTDIGITS: the UCI *optical recognition of handwritten digits*, originally with 64 dimensions.
- GIsETTE: the LIBSVM *gisette* dataset, handwritten digits, subset of MNIST, originally with 5000 dimensions.

162  
163  
164  
165  
166  
167  
168  
169  
170  
171  
172  
173  
174  
175  
176  
177  
178  
179  
180  
181  
182  
183  
184  
185  
186  
187  
188  
189  
190  
191  
192  
193  
194  
195  
196  
197  
198  
199  
200  
201  
202  
203  
204  
205  
206  
207  
208  
209  
210  
211  
212  
213  
214  
215

- REUTERS: the UCI *Reuters-21578* dataset, text documents, with 18933 words.
- RCV1: text documents from four classes, with 29992 words.
- PENDIGITS: the UCI *pen-based recognition of handwritten digits* dataset, originally with 16 dimensions.
- PROTEIN: the LIBSVM *protein* dataset, originally with 357 dimensions.
- 20NEWS: text documents from 20 newsgroups; 10,000 words with maximum information gain are preserved.
- MNIST: handwritten digit images, each of size  $28 \times 28$ .
- SEISMIC: the LIBSVM *SensIT Vehicle (seismic)* dataset, distributed sensor network data for vehicle classification, originally with 50 dimensions.

## 2 External algorithm sources

- *1-Spectral Clustering*<sup>1</sup>
- *Interaction Component Model*<sup>2</sup>

## References

- [1] Jean-Philippe Brunet, Pablo Tamayo, Todd R. Golub, and Jill P. Mesirov. Metagenes and molecular pattern discovery using matrix factorization. *Proceedings of the National Academy of Sciences*, 101(12):4164–4169, 2004.
- [2] P. Kim and B. Tidor. Subsystem identification through dimensionality reduction of large-scale gene expression data. *Genome Research*, 13(7):1706–1718, 2003.

---

<sup>1</sup><http://www.ml.uni-saarland.de/code/oneSpectralClustering/oneSpectralClustering.html>

<sup>2</sup><http://netpro.r-forge.r-project.org/>
